# Supplementary material for: Enhancing SARS-CoV-2 Surveillance through Regular Genomic Sequencing in Spain: The RELECOV Network
Source: MDPI journal article supplement (doi:10.3390/ijms24108573), 2023-05-10
Supplement: s1 [file s1]

**Supplementary Table S1.** Detailed Lineages and sublineages included in this study for viral tracking changes in SARS-CoV-2.

**DELTA VARIANT   OMICRON VARIANT**

| Lineage | Lineage   |
|---------|-----------|
| AY.1    | BA.1      |
| AY.10   | BA.1.1    |
| AY.11   | BA.2      |
| AY.12   | BA.3      |
| AY.13   | BA.1.1.1  |
| AY.14   | BA.1.1.2  |
| AY.15   | BA.1.1.3  |
| AY.16   | BA.1.1.4  |
| AY.17   | BA.1.1.5  |
| AY.18   | BA.1.1.6  |
| AY.19   | BA.1.1.7  |
| AY.2    | BA.1.1.8  |
| AY.20   | BA.1.1.9  |
| AY.21   | BA.1.1.10 |
| AY.22   | BA.1.1.11 |
| AY.23   | BA.1.1.12 |
| AY.23.1 | BA.1.1.13 |
| AY.24   | BA.1.1.14 |
| AY.25   | BA.1.1.15 |
| AY.26   | BA.1.1.16 |
| AY.27   | BA.1.1.17 |
| AY.28   | BA.1.2    |
| AY.29   | BA.1.3    |
| AY.29.1 | BA.1.4    |
| AY.3    | BA.1.5    |
| AY.3.1  | BA.1.6    |
| AY.30   | BA.1.7    |
| AY.31   | BA.1.8    |
| AY.32   | BA.1.9    |
| AY.33   | BA.1.10   |
| AY.34   | BA.1.12   |
| AY.35   | BA.1.13   |

|           |           |
|-----------|-----------|
| AY.36     | BA.1.13.1 |
| AY.37     | BA.1.14   |
| AY.38     | BA.1.14.1 |
| AY.39     | BA.1.14.2 |
| AY.39.1   | BA.1.15   |
| AY.39.1.1 | BA.1.15.1 |
| AY.4      | BA.1.15.2 |
| AY.4.1    | BA.1.16   |
| AY.4.2    | BA.1.16.1 |
| AY.4.4    | BA.1.16.2 |
| AY.4.5    | BA.1.17   |
| AY.40     | BA.1.17.1 |
| AY.41     | BA.1.17.2 |
| AY.5      | BA.1.18   |
| AY.5.1    | BA.1.19   |
| AY.5.2    | BA.1.20   |
| AY.6      | BA.1.21   |
| AY.7      | BA.1.21.1 |
| AY.7.1    | BA.2.1    |
| AY.7.2    | BA.2.2    |
| AY.8      | BA.2.3    |
| AY.9      | BA.2.3.1  |
| B.1.617.2 | BA.2.3.2  |
| AY.9.1    | BA.2.4    |
| AY.9.2    | BA.2.5    |
| AY.9.2.1  | BA.2.6    |
| AY.16.1   | BA.2.7    |
| AY.34.1   | BA.2.8    |
| AY.39.2   | BA.2.9    |
| AY.42     | BA.2.9.1  |
| AY.43     | BA.2.10   |
| AY.44     | BA.2.10.1 |
| AY.45     | BA.2.11   |
| AY.46     | BA.2.12   |
| AY.46.1   | BA.2.12.1 |
| AY.46.2   | BA.2.13   |
| AY.46.3   | BA.2.14   |

|         |           |
|---------|-----------|
| AY.46.4 | BA.2.15   |
| AY.46.5 | BA.2.16   |
| AY.46.6 | BA.4      |
| AY.47   | BA.5      |
| AY.48   | BA.1.1.18 |
| AY.49   | BA.1.22   |
| AY.50   | BA.2.3.4  |
| AY.51   | BA.2.9.2  |
| AY.52   | BA.2.10.2 |
| AY.53   | BA.2.17   |
| AY.54   | BA.2.18   |
| AY.55   | BA.2.19   |
| AY.56   | BA.2.20   |
| AY.57   | BA.2.21   |
| AY.58   | BA.2.22   |
| AY.59   | BA.2.23   |
| AY.60   | BA.2.23.1 |
| AY.61   | BA.2.24   |
| AY.62   | BA.2.25   |
| AY.63   | BA.2.25.1 |
| AY.64   | BA.2.26   |
| AY.65   | BA.2.27   |
| AY.66   | BA.2.28   |
| AY.67   | BA.2.29   |
| AY.68   | BA.2.30   |
| AY.69   | BA.2.31   |
| AY.70   | BA.2.32   |
| AY.71   | BA.2.33   |
| AY.72   | BA.2.34   |
| AY.73   | BA.2.35   |
| AY.74   | BA.2.36   |
| AY.75   | BA.2.37   |
| AY.75.1 | BA.2.38   |
| AY.76   | BA.2.39   |
| AY.77   | BA.2.40   |
| AY.78   | BA.2.40.1 |
| AY.79   | BA.2.41   |

|         |           |
|---------|-----------|
| AY.80   | BA.3.1    |
| AY.81   | BA.5.1    |
| AY.82   | BC.1      |
| AY.83   | BC.2      |
| AY.84   | BD.1      |
| AY.85   | BE.1      |
| AY.86   | BE.1.1    |
| AY.87   | BE.2      |
| AY.88   | BA.1.15.3 |
| AY.89   | BA.1.23   |
| AY.90   | BA.1.24   |
| AY.91   | BA.2.2.1  |
| AY.91.1 | BA.2.3.5  |
| AY.92   | BA.2.3.6  |
| AY.93   | BA.2.3.7  |
| AY.94   | BA.2.3.8  |
| AY.95   | BA.2.3.9  |
| AY.96   | BA.2.3.10 |
| AY.97   | BA.2.3.11 |
| AY.98   | BA.2.3.12 |
| AY.98.1 | BA.2.3.13 |
| AY.99   | BA.2.3.14 |
| AY.99.1 | BA.2.3.15 |
| AY.99.2 | BA.2.3.16 |
| AY.100  | BA.2.3.17 |
| AY.101  | BA.2.3.18 |
| AY.102  | BA.2.9.3  |
| AY.103  | BA.2.9.4  |
| AY.104  | BA.2.9.5  |
| AY.105  | BA.2.10.3 |
| AY.106  | BA.2.12.2 |
| AY.107  | BA.2.38.1 |
| AY.108  | BA.2.42   |
| AY.109  | BA.2.43   |
| AY.110  | BA.2.44   |
| AY.111  | BA.2.45   |
| AY.112  | BA.2.46   |

|           |           |
|-----------|-----------|
| AY.113    | BA.2.47   |
| AY.114    | BA.2.48   |
| AY.116    | BA.2.49   |
| AY.116.1  | BA.2.50   |
| AY.117    | BA.2.51   |
| AY.3.2    | BA.2.52   |
| AY.3.3    | BA.2.53   |
| AY.4.2.1  | BA.2.54   |
| AY.4.2.2  | BA.2.55   |
| AY.4.2.3  | BA.2.56   |
| AY.4.6    | BA.2.56.1 |
| AY.4.7    | BA.2.57   |
| AY.4.8    | BA.2.58   |
| AY.4.9    | BA.2.59   |
| AY.4.10   | BA.2.60   |
| AY.5.3    | BA.2.61   |
| AY.5.4    | BA.2.62   |
| AY.5.5    | BA.2.63   |
| AY.9.2.2  | BA.2.64   |
| AY.20.1   | BA.2.65   |
| AY.23.2   | BA.2.66   |
| AY.25.1   | BA.2.67   |
| AY.25.1.1 | BA.2.68   |
| AY.26.1   | BA.2.69   |
| AY.33.1   | BA.2.70   |
| AY.34.1.1 | BA.2.71   |
| AY.34.2   | BA.2.72   |
| AY.39.1.2 | BA.2.73   |
| AY.39.1.3 | BA.2.74   |
| AY.42.1   | BA.2.75   |
| AY.43.1   | BA.2.76   |
| AY.43.2   | BA.2.77   |
| AY.43.3   | BA.2.80   |
| AY.43.4   | BA.2.81   |
| AY.43.5   | BA.4.1    |
| AY.43.6   | BA.4.1.1  |
| AY.43.7   | BA.4.1.2  |

|            |          |
|------------|----------|
| AY.46.6.1  | BA.4.1.3 |
| AY.75.2    | BA.4.1.4 |
| AY.75.3    | BA.4.2   |
| AY.102.1   | BA.4.3   |
| AY.102.2   | BA.4.4   |
| AY.112.1   | BA.4.5   |
| AY.118     | BA.4.6   |
| AY.119     | BA.4.7   |
| AY.119.1   | BA.5.1.1 |
| AY.119.2   | BA.5.1.2 |
| AY.120     | BA.5.1.3 |
| AY.120.1   | BA.5.1.4 |
| AY.120.2   | BA.5.2   |
| AY.120.2.1 | BA.5.2.1 |
| AY.121     | BA.5.2.2 |
| AY.121.1   | BA.5.2.3 |
| AY.122     | BA.5.2.4 |
| AY.122.1   | BA.5.3   |
| AY.122.2   | BA.5.3.1 |
| AY.122.3   | BA.5.3.2 |
| AY.123     | BA.5.3.3 |
| AY.123.1   | BA.5.3.4 |
| AY.124     | BA.5.5   |
| AY.124.1   | BA.5.6   |
| AY.125     | BE.3     |
| AY.126     |          |
| AY.127     |          |
| AY.127.1   |          |
| AY.128     |          |
| AY.129     |          |
| AY.131     |          |
| AY.132     |          |
| AY.133     |          |
| AY.3.4     |          |
| AY.4.2.4   |          |
| AY.4.11    |          |
| AY.4.12    |          |

AY.25.3  
AY.103.1  
AY.103.2  
AY.122.4  
AY.125.1  
AY.4.2.5  
AY.5.6  
AY.5.7  
AY.25.1.2  
AY.25.2  
AY.29.2  
AY.33.2  
AY.36.1  
AY.39.3  
AY.43.8  
AY.43.9  
AY.112.2  
AY.112.3  
AY.122.5  
AY.122.6  
AY.124.1.1  
AY.127.2  
AY.127.3  
AY.4.13  
AY.4.14  
AY.4.15  
AY.4.16  
AY.4.17  
AY.134  
AY.4.3  
AY.24.1

**Supplementary Figure S1.** Timecourse of variant distribution by month in all submitted sequences to GISAID until 2022-03-15. Source: GISAID\_hCoV-19\_Analysis\_Update\_20220315.

**Timecourse of variant distribution in all submitted sequences  
2022-03-15**

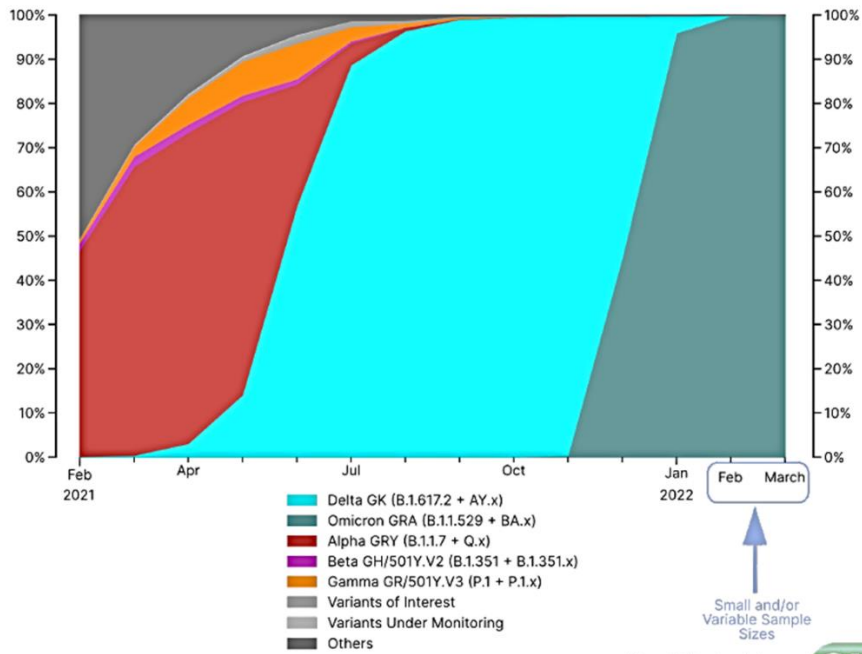

We gratefully acknowledge the Authors from Originating and Submitting laboratories of sequence data on which the analysis is based.

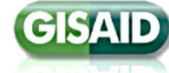

by BII/GIS, A\*STAR Singapore
