# Supplementary material for: Enhancing SARS-CoV-2 Surveillance through Regular Genomic Sequencing in Spain: The RELECOV Network
Source: MDPI journal article supplement (doi:10.3390/ijms24108573), 2023-05-10
Supplement: s1 [file s1]

| <b>RELECOV network members</b>                                                                | <b>Affiliation</b>                                                                                                                                                                                                                                                                                                              |
|-----------------------------------------------------------------------------------------------|---------------------------------------------------------------------------------------------------------------------------------------------------------------------------------------------------------------------------------------------------------------------------------------------------------------------------------|
| Adolfo de Salazar; Carlos S. Casimiro-Soriguer                                                | Hospital Universitario San Cecilio, Granada. CIBER de Enfermedades Infecciosas (CIBERINFEC), Instituto de Salud Carlos III; Computational Medicine Platform, Andalusian Public Foundation Progress and Health-FPS. Institute of Biomedicine of Seville, IBiS, University Hospital Virgen del Rocío, CSIC, University of Sevilla |
| Javier Perez-Florido, Joaquin Dopazo                                                          | Hospital Universitario Virgen del Rocío. Sevilla; Computational Medicine Platform, Andalusian Public Foundation Progress and Health-FPS. Institute of Biomedicine of Seville, IBiS, University Hospital Virgen del Rocío, CSIC, University of Sevilla                                                                           |
| Jessica Bueno, Sonia Algarate                                                                 | Hospital Clínico Universitario Lozano Blesa                                                                                                                                                                                                                                                                                     |
| Antonio Rezusta; Ana Milagro Beamonte                                                         | Hospital Universitario Miguel Servet                                                                                                                                                                                                                                                                                            |
| Alba de Martino; Mark Strunk                                                                  | Centro de Investigación Biomédica de Aragón                                                                                                                                                                                                                                                                                     |
| José Antonio Boga; Zulema Pérez Martínez.                                                     | Hospital Universitario Central de Asturias                                                                                                                                                                                                                                                                                      |
| Antonio Oliver; Gabriel Cabot                                                                 | Hospital Universitario Son Espases                                                                                                                                                                                                                                                                                              |
| Diego García-Martínez de Artola; Helena Gil-Campesino                                         | Hospital Universitario Ntra. Sra de Candelaria                                                                                                                                                                                                                                                                                  |
| Jose M. Lorenzo-Salazar; Rafaela González-Montelongo                                          | Instituto Tecnológico y de Energías Renovables, S.A.                                                                                                                                                                                                                                                                            |
| Ana Bordes; Francisco Chamizo López                                                           | Hospital Universitario de Gran Canaria Dr. Negrín                                                                                                                                                                                                                                                                               |
| Jesus Rodriguez-Lozano; Jorge Calvo-Montes                                                    | Hospital Universitario Marqués de Valdecilla-IDIVAL. CIBER de Enfermedades Infecciosas (CIBERINFEC), Instituto de Salud Carlos III                                                                                                                                                                                              |
| Soledad Illescas; José Martínez Alarcón                                                       | Hospital Universitario de Ciudad Real                                                                                                                                                                                                                                                                                           |
| Eva Heredero Gálvez; Patricia Trevisi                                                         | Complejo Hospitalario de Toledo.                                                                                                                                                                                                                                                                                                |
| Caridad Sainz de Baranda; Lorena Robles Fonseca                                               | Complejo Hospitalario Universitario de Albacete                                                                                                                                                                                                                                                                                 |
| Jose Maria Eiros; Marta Hernández; David Abad; Silvia Rojo; Sonsoles Garcinuño; Gabriel March | Consortio LUCIA (SACYL, ITACYL, UBU, UVa)                                                                                                                                                                                                                                                                                       |
| Andrés Antón; Cristina Andrés                                                                 | Hospital Universitari Vall d'Hebron                                                                                                                                                                                                                                                                                             |
| Ignacio Blanco Guillermo; Elisa Martró                                                        | Hospital Universitari Germans Trias i Pujol                                                                                                                                                                                                                                                                                     |

|                                                                   |                                                                            |
|-------------------------------------------------------------------|----------------------------------------------------------------------------|
| M <sup>a</sup> Ángeles Marcos Maeso; Elisa Rubio                  | Hospital Clínic de Barcelona                                               |
| Jordi Càmara Mas; Sara Martí                                      | Hospital Universitari de Bellvitge-IDIBELL-CIBERes                         |
| Teresa Sans Mateu; Gemma Recio Comí                               | Hospital Joan XXIII                                                        |
| Mireia Canal; Juanjo Hernández                                    | Laboratori de Referencia de Catalunya                                      |
| Glòria Soria; Francisco Vidal                                     | Banc de Sang i Teixits Catalunya                                           |
| Mel·lina Pinsach; Ramon Brugada                                   | Hospital Dr. Josep Trueta                                                  |
| Salomé Hijano Villegas; Patricia González Donapetry               | Hospital Universitario de Ceuta                                            |
| María del Carmen González Velasco; Cristina Eugenia Gaona Álvarez | Hospital Universitario de Badajoz                                          |
| German Bou Arevalo; Ana Fernandez Gonzalez                        | Hospital de A Coruña                                                       |
| Maria Luisa Perez del Molino; José Javier Costa Alcalde           | Complejo Hospitalario Santiago de Compostela                               |
| Benito Regueiro Garcia; Carlos Daviña Núñez                       | Complejo Hospitalario Universitario de Vigo                                |
| María Pilar Bea-Escudero                                          | Plataforma de Genómica y Bioinformática. La Rioja                          |
| Manuel Ponce-Alonso; Laura Martínez García                        | Hospital Universitario Ramón y Cajal                                       |
| Esther Viedma; Carmen Martin-Higuera                              | Hospital Universitario 12 de Octubre. Biomedical Research Institute imas12 |
| Julio García Rodríguez; Iván Bloise Sánchez                       | Hospital Universitario La Paz                                              |
| Patricia Muñoz; Laura Perez Lago                                  | Hospital General Universitario Gregorio Marañón                            |
| Sergio Román Soto; Víctor Céspedes Balderrama                     | Hospital Comarcal de Melilla                                               |
| Laura Moreno Parrado; Marina Simón Páez                           | Hospital Universitario Virgen de la Arrixaca                               |
| Ana Navascues; Miguel Fernández Huerta                            | Hospital Universitario de Navarra                                          |
| Mikel Urrutikoetxea Gutierrez                                     | Hospital Universitario de Basurto                                          |
| Mikel Gallego Rodrigo; Clara Lejarraga Cañas                      | Hospital Universitario Cruces                                              |
| Ane Sorarrain Zarraga; Milagrosa Montes                           | Hospital Universitario Donostia                                            |
| Sara Monzón Fernández; Sarai Varona Fernández                     | Unidad de Bioinformática. Instituto de Salud Carlos III                    |

|                                               |                                                        |
|-----------------------------------------------|--------------------------------------------------------|
| María Alma Bracho Lapiedra; Lidia Ruiz Roldán | FISABIO Univ.Valencia-Epidemiología Molecular          |
| Nieves Gonzalo Jimenez; Antonio Galiana       | Hospital General Universitario de Elche                |
| Concepción Gimeno; Rafael Medina              | Consortio Hospital General Universitario de Valencia   |
| Juan Carlos Rodríguez Díaz; Maria Paz Ventero | Hospital General Universitario de Alicante             |
| David Navarro; Eliseo Albert                  | Hospital Clínico Universitario de Valencia             |
| Dolores Tirado; Marta Gil                     | Hospital General Universitario de Castellón            |
| José Miguel Nogueira; Juan Alberola           | Hospital Doctor Peset de Valencia                      |
| José Luis López Hontangas; Luis Ramón         | Hospital Universitario y Politécnico La Fe de Valencia |
